# Supplementary material for: Nanocrystalline Fe–Fe2O3 particle-deposited N-doped graphene as an activity-modulated Pt-free electrocatalyst for oxygen reduction reaction
Source: Royal Society of Chemistry journal article supplement (doi:10.1039/c5nr04929f), 2015-01-01
Supplement: c5nr04929f1.pdf [file c5nr04929f1.pdf]

**Supplementary Information**

**Nanocrystalline Fe-Fe<sub>2</sub>O<sub>3</sub> Particle-Deposited N-doped  
Graphene as an Activity Modulated Pt-Free Electrocatalyst  
for Oxygen Reduction Reaction**

**Vishal M. Dhavale,<sup>a,b</sup> Santosh K. Singh,<sup>a,b</sup> Ayasha Nadeema,<sup>a,b</sup> Sachin S.  
Gaikwad,<sup>a</sup> Sreekumar Kurungot<sup>\*,a,b</sup>**

*<sup>a</sup>Physical and Materials Chemistry Division, National Chemical Laboratory,  
Pune-411008, India, Fax: +91-20-25902636; Tel: +91-20-25902566;*

*E-mail: [k.sreekumar@ncl.res.in](mailto:k.sreekumar@ncl.res.in)*

*<sup>b</sup>Academy of Scientific and Innovative Research (AcSIR), Anusandhan Bhawan, 2  
Rafi Marg, New Delhi-110001, India.*

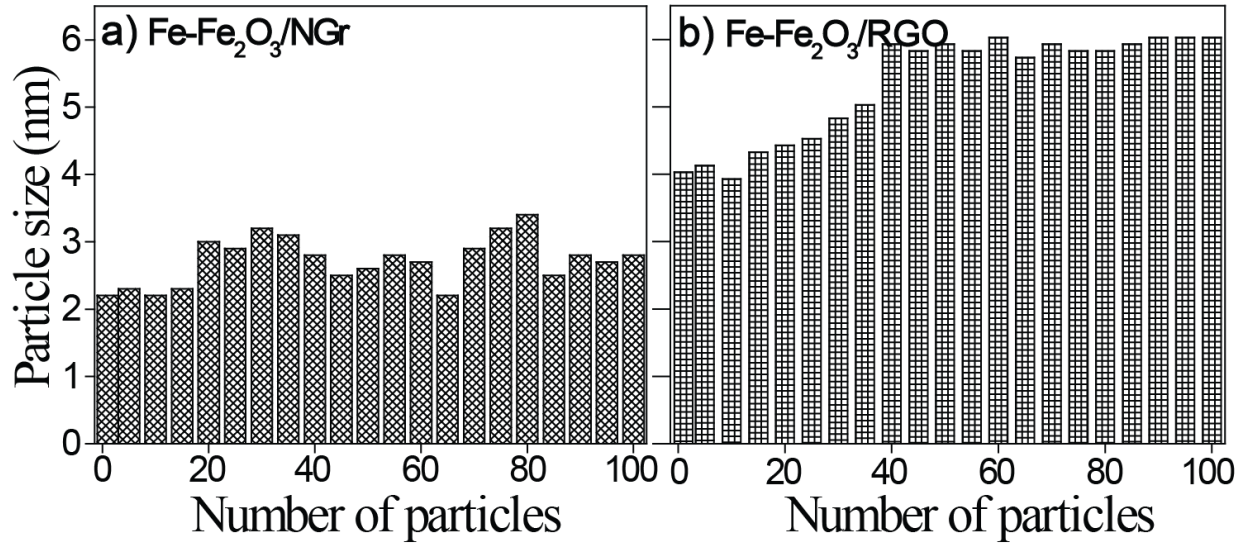

**Figure S1:** Particle size histograms of Fe-Fe<sub>2</sub>O<sub>3</sub>/NGr (a), and Fe-Fe<sub>2</sub>O<sub>3</sub>/RGO (b).

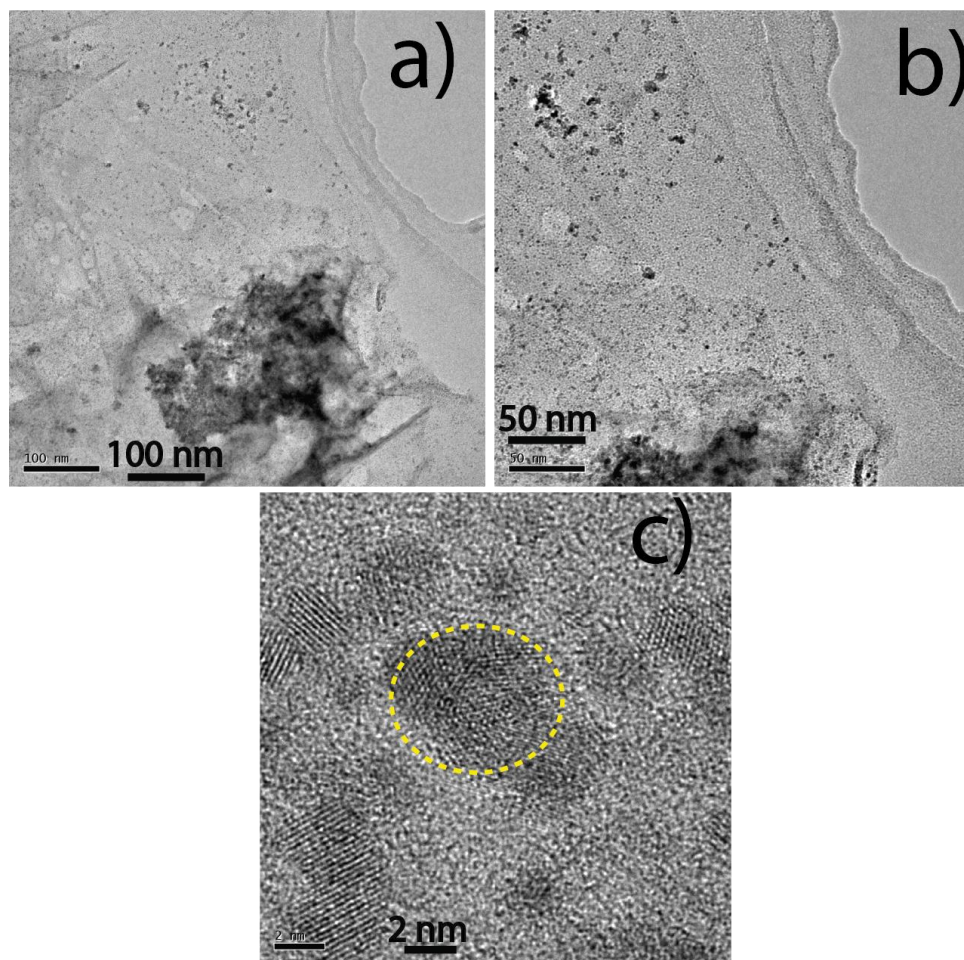

**Figure S2:** TEM images of Fe-Fe<sub>2</sub>O<sub>3</sub>/RGO: a) and b) are the images taken at different magnifications and (c) HR-TEM image representing the lattice fringes. The boundary of a single Fe-Fe<sub>2</sub>O<sub>3</sub> particle is marked with the yellow dotted circle.

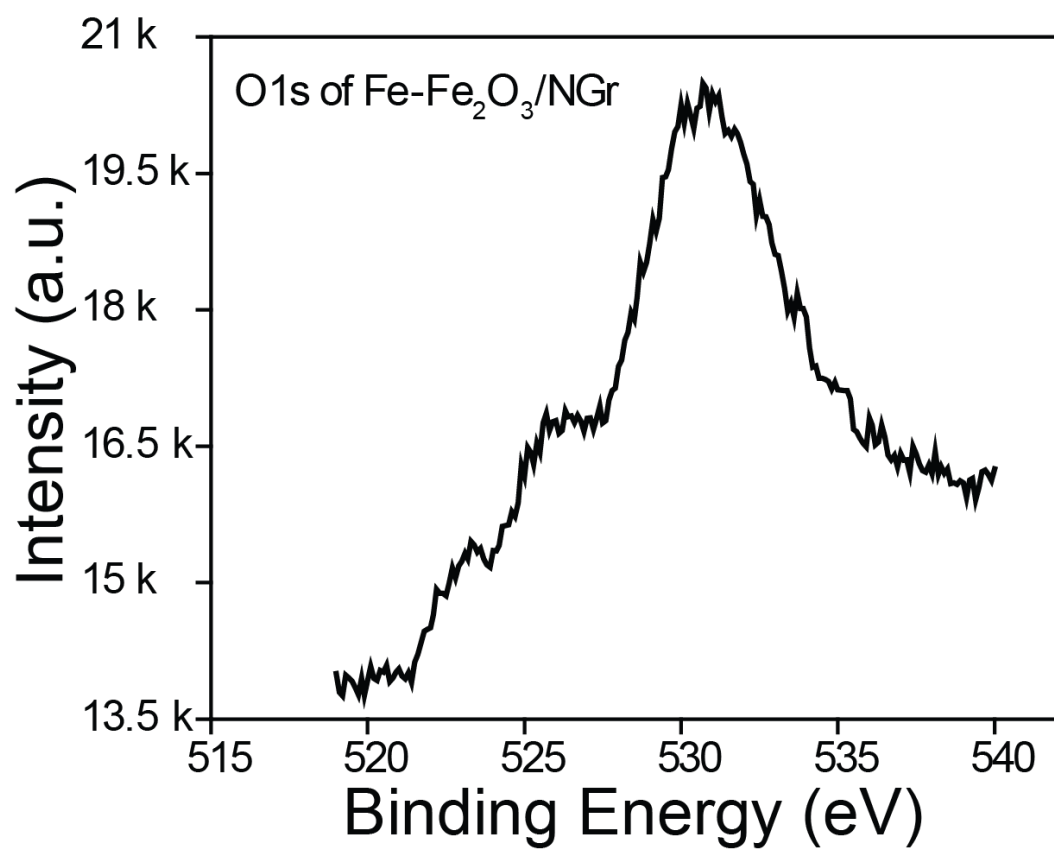

*Figure S3: XPS of O1s of Fe-Fe<sub>2</sub>O<sub>3</sub>/NGr.*

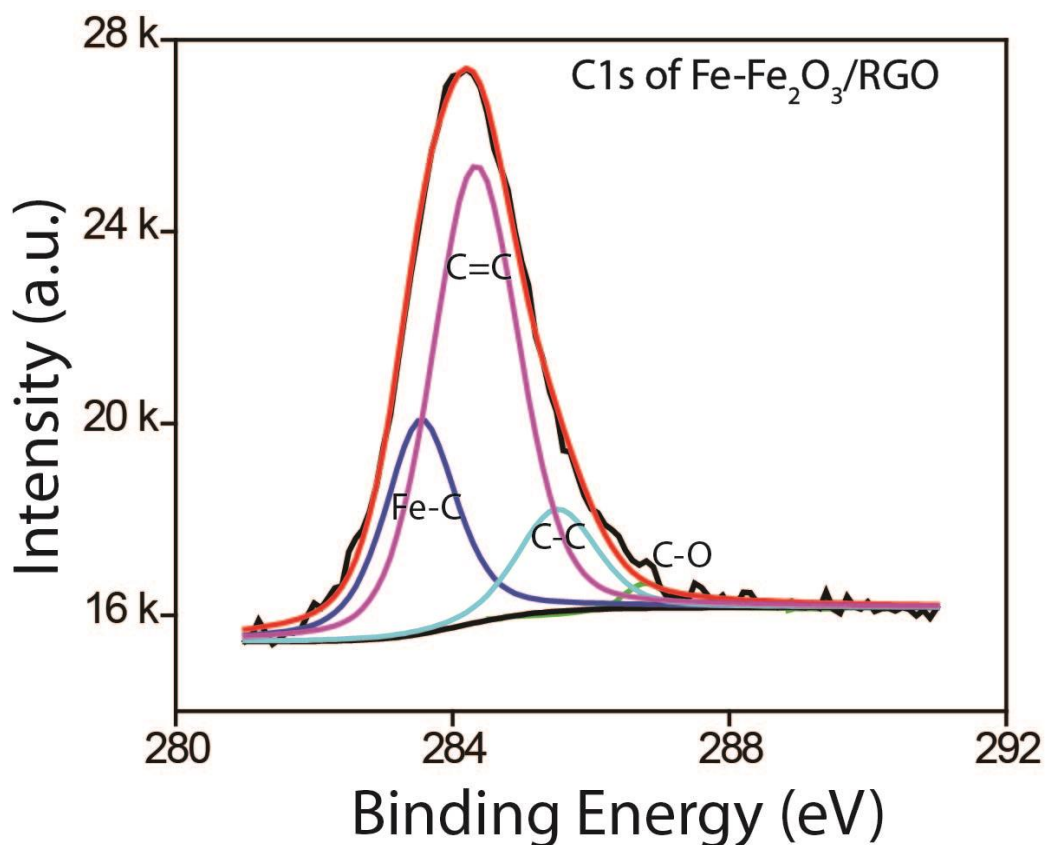

**Figure S4:** Deconvoluted XPS of C1s of Fe-Fe<sub>2</sub>O<sub>3</sub>/RGO. The peak at the lower binding energy (283.54 eV) indicates the interaction of Fe and C, whereas, the peaks at 284.33 and 285.51 eV are credited to the presence of  $sp^2$  (C=C) and  $sp^3$  (C-C) carbons. Lastly, the peak at the higher binding energy of 286.35 eV indicates the presence of the oxygen functional groups on the carbon surface.

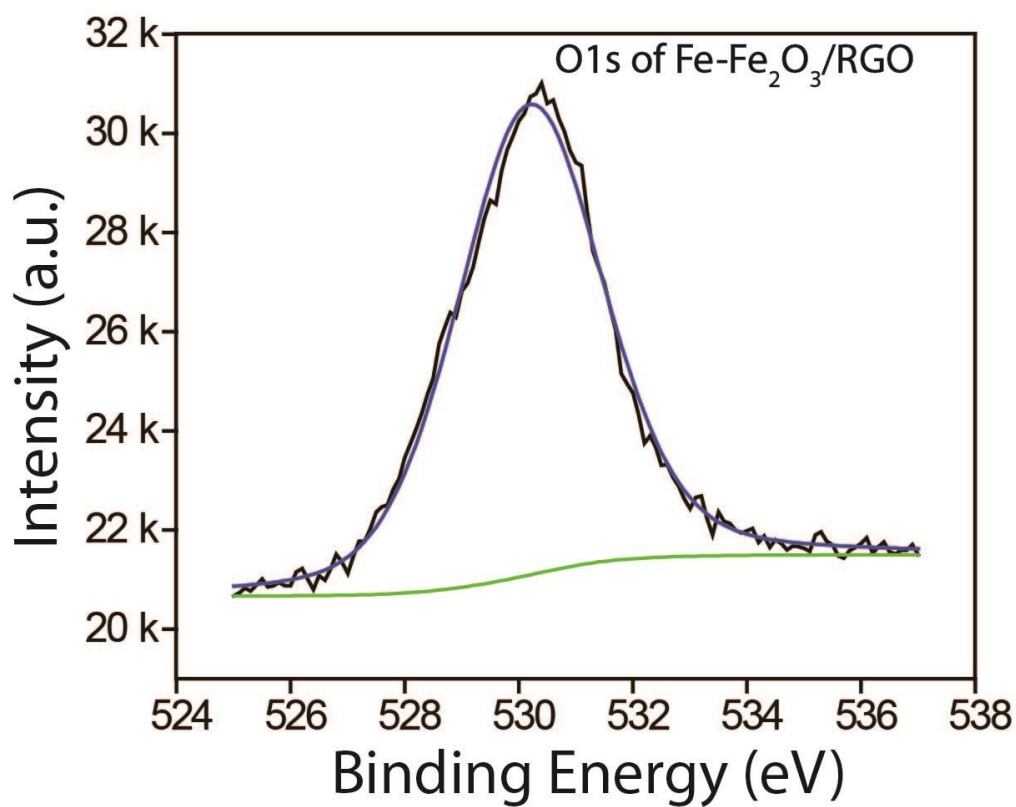

*Figure S5: XPS of O1s of Fe-Fe<sub>2</sub>O<sub>3</sub>/RGO.*

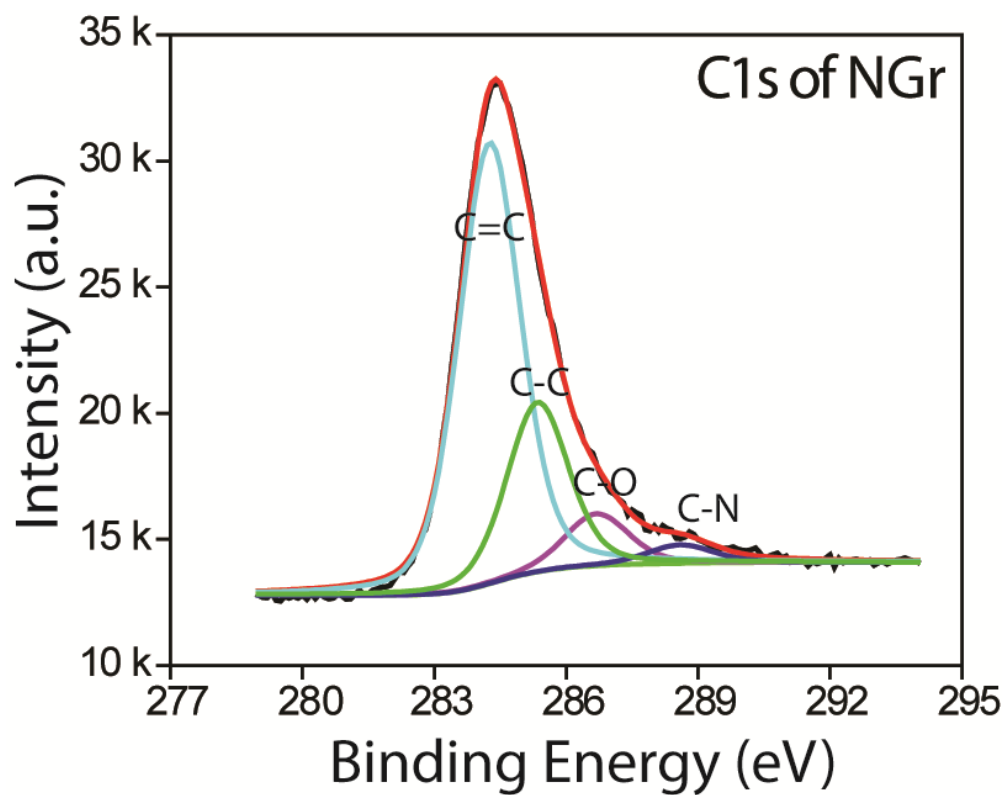

**Figure S6:** Deconvoluted XPS of C1s of NGr. The peaks at 284.34, 285.69, 286.72, and 287.80 eV are credited to the presence of C=C, C-C, C-O and C-N bonding, respectively. Peaks at the higher binding energy provide the evidence of 'C' coordination with the 'O' and 'N'.

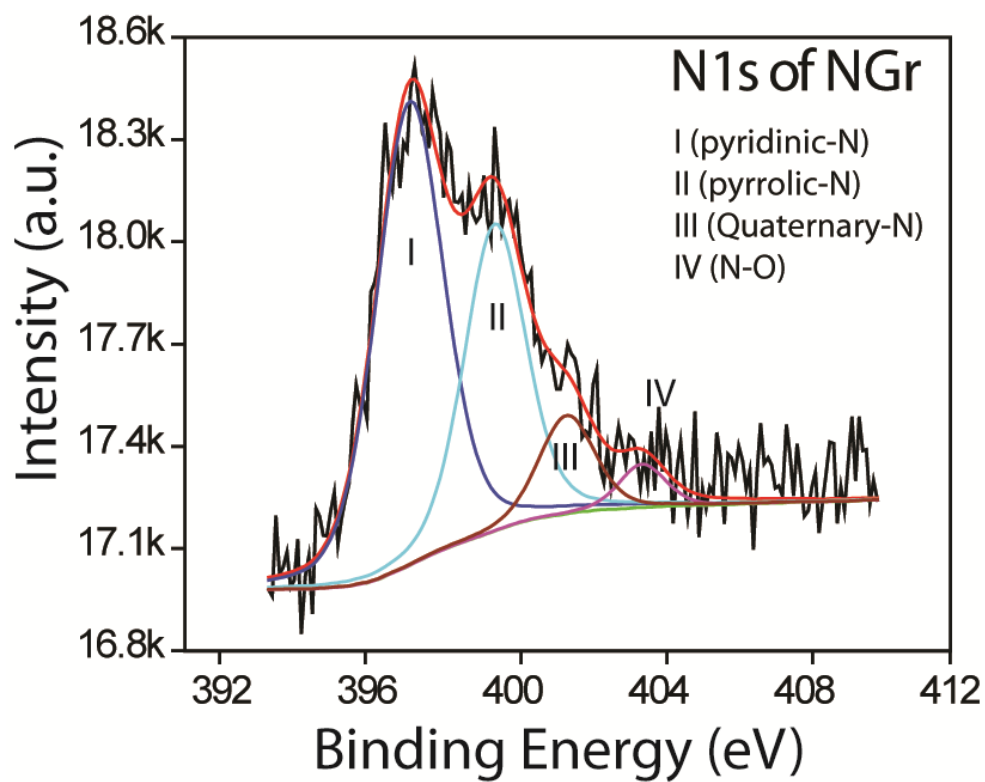

**Figure S7:** Deconvoluted XPS of N1s of NGr. The peaks at 398.34, 399.45, 401.98, and 403.62 eV are assigned to the presence of pyridinic-N, pyrrolic-N, quaternary-N and N-O bonding, respectively.



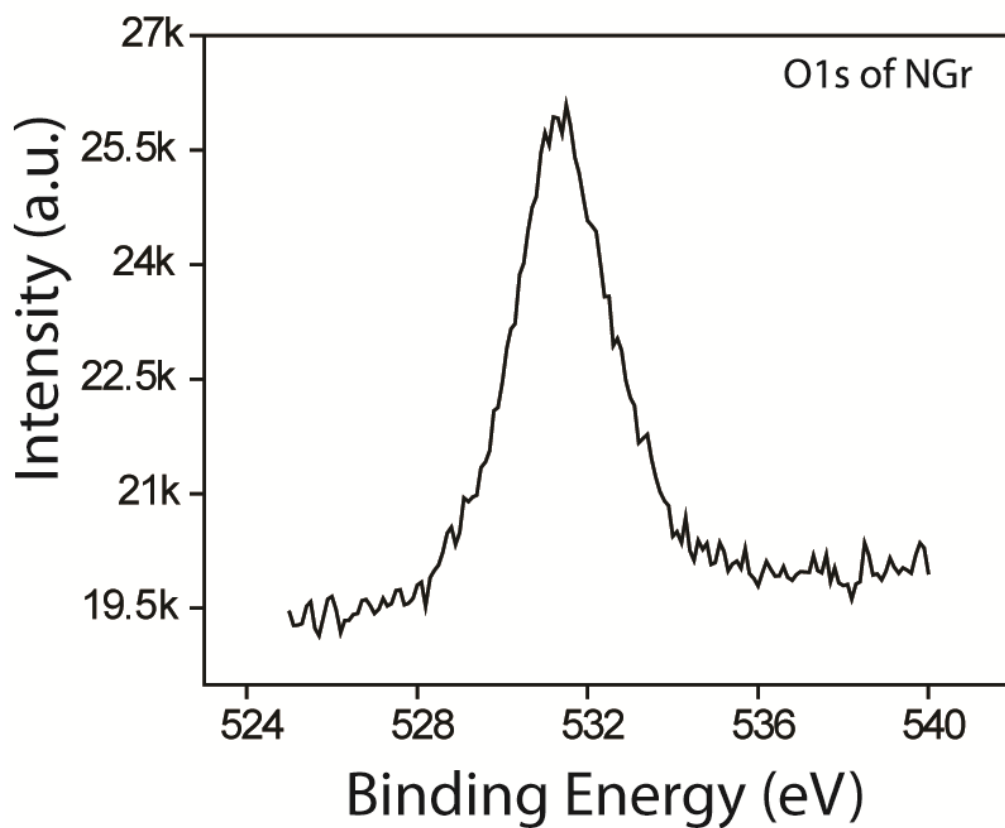

*Figure S8: Deconvulated XPS of O1s of NGr.*

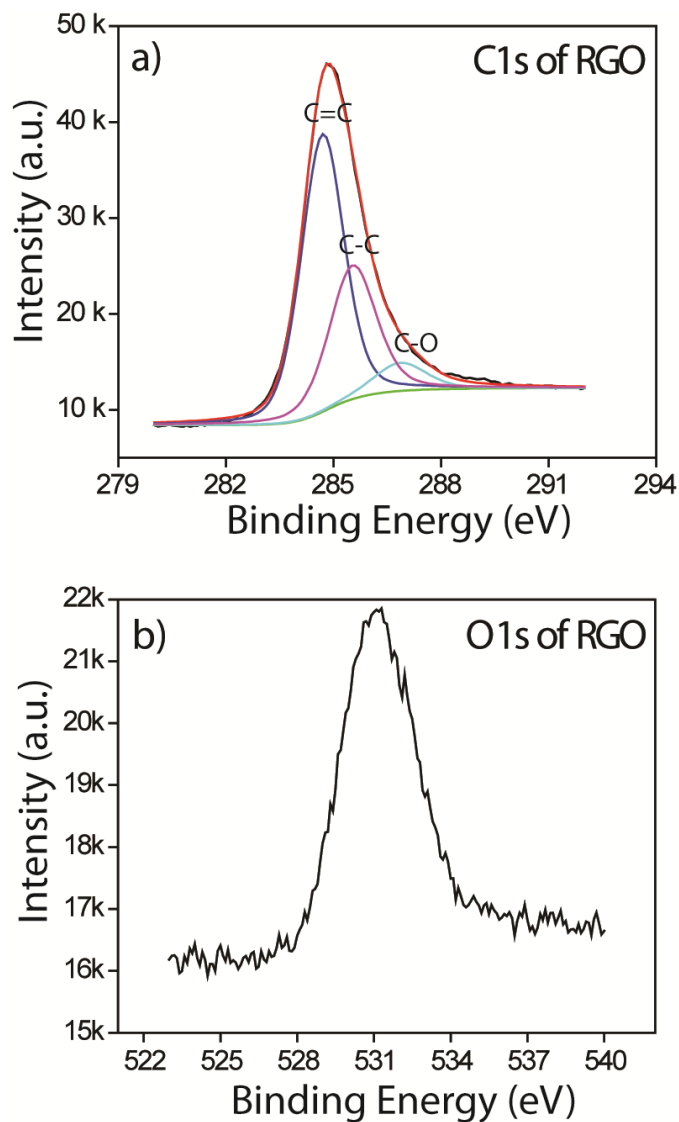

**Figure S9:** (a) Deconvoluted XPS of C1s of RGO. The peak at 284.70 and 285.50 eV are credited to the presence of the  $sp^2$  (C=C) and  $sp^3$  (C-C) carbons. Lastly, the peak at the higher binding energy (287.0 eV) indicates the presence of oxygen functional groups on the carbon surface; (b) XPS of O1s of RGO.

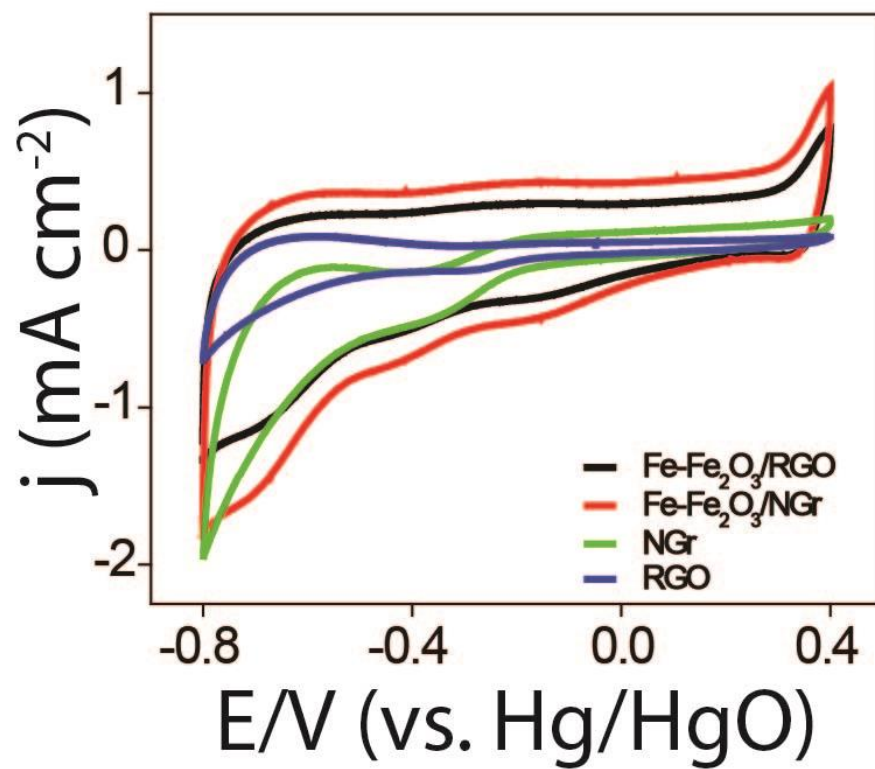

**Figure S10:** Comparative cyclic voltammograms of Fe-Fe<sub>2</sub>O<sub>3</sub>/RGO, Fe-Fe<sub>2</sub>O<sub>3</sub>/NGr, NGr and RGO. Conditions: electrolyte: N<sub>2</sub>-saturated 0.1 M KOH and scan rate: 20 mV/s.

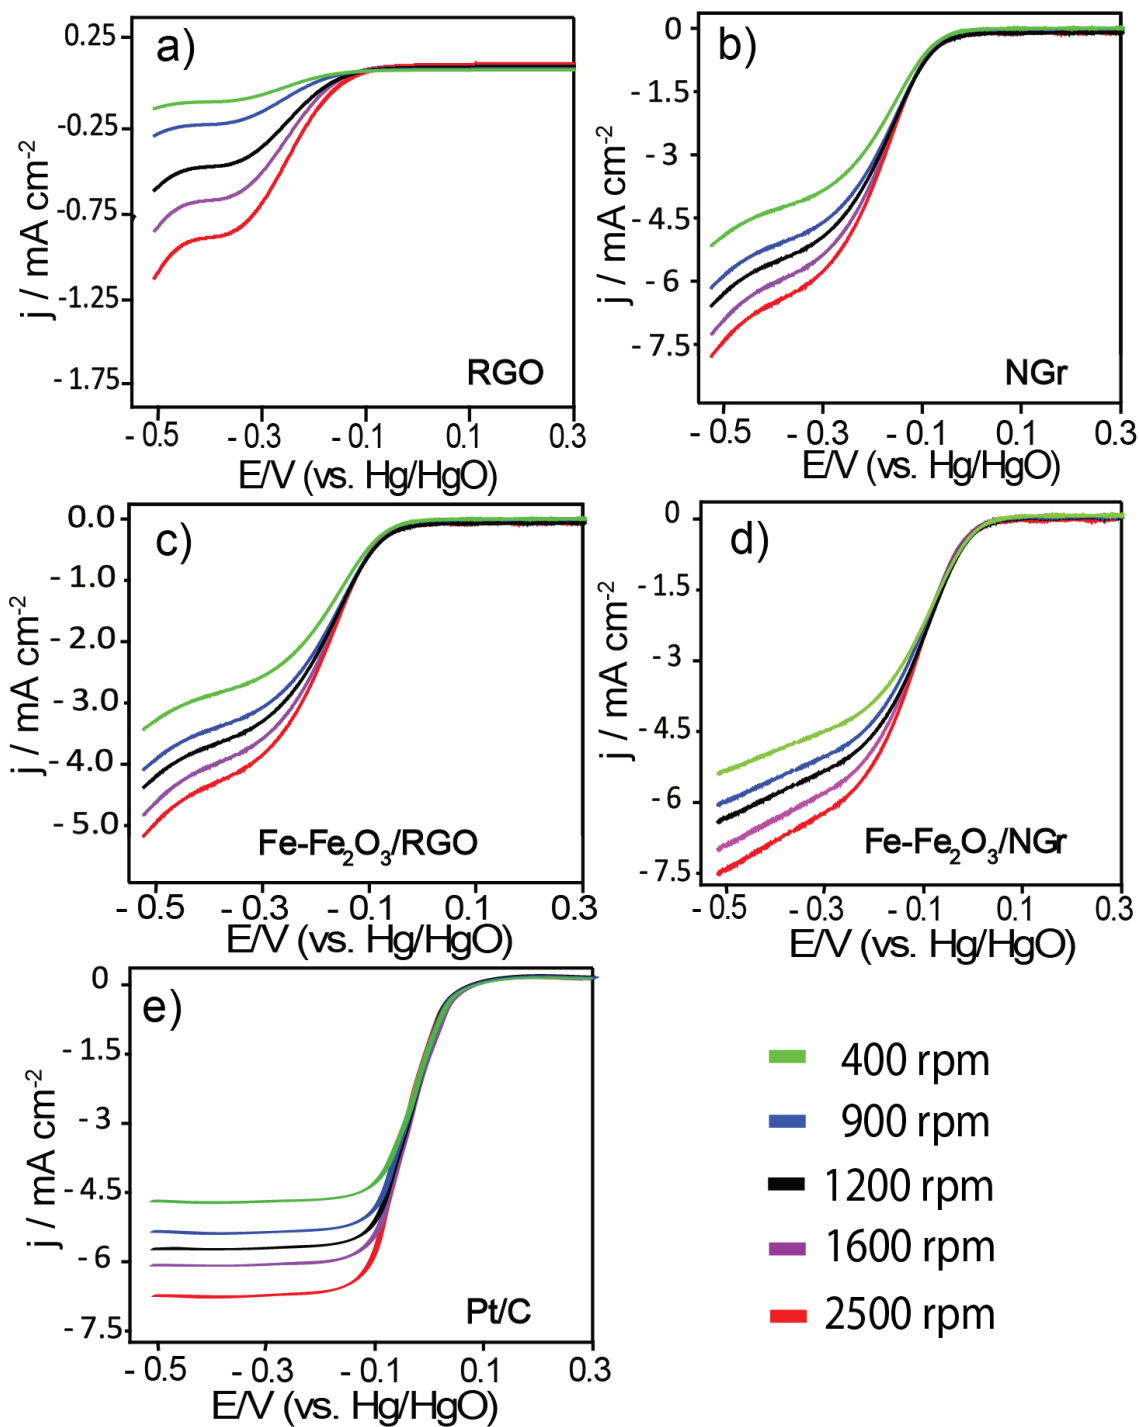

**Figure S11:** Hydrodynamic study at different rotation rates of the working electrode in  $\text{O}_2$ -saturated alkaline electrolyte, (a) RGO, (b) NGr, (c)  $\text{Fe-Fe}_2\text{O}_3/\text{RGO}$ , (d)  $\text{Fe-Fe}_2\text{O}_3/\text{NGr}$ , and (e)  $\text{Pt/C}$ . Conditions: electrolyte:  $\text{O}_2$ -saturated 0.1 M KOH and scan rate: 10 mV/s.

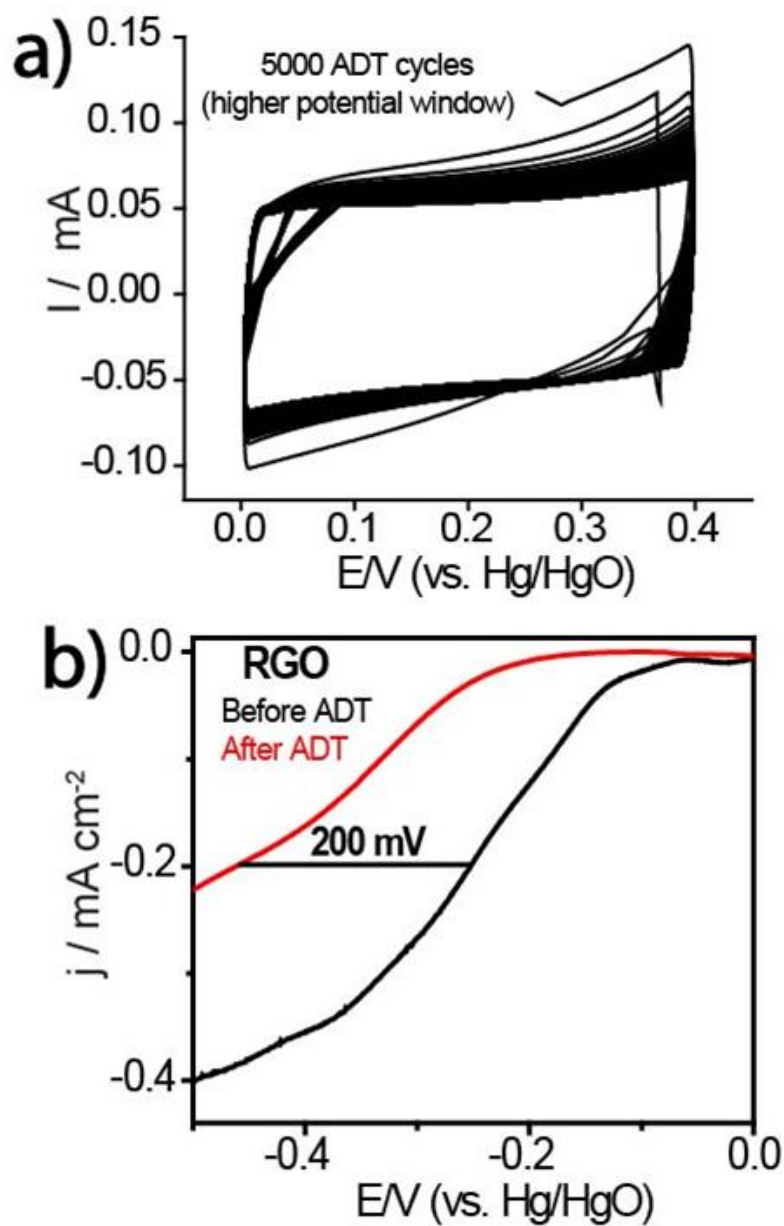

**Figure S12:** Accelerated durability test (ADT) of RGO in 0.1 M KOH. (a) 5000 potential cycles recorded at a scan rate of 50 mV/s in the potential window of 0.0 to 0.40 V (vs. Hg/HgO), and (b) comparative LSV curves before and after ADT, recorded at 10 mV/s.

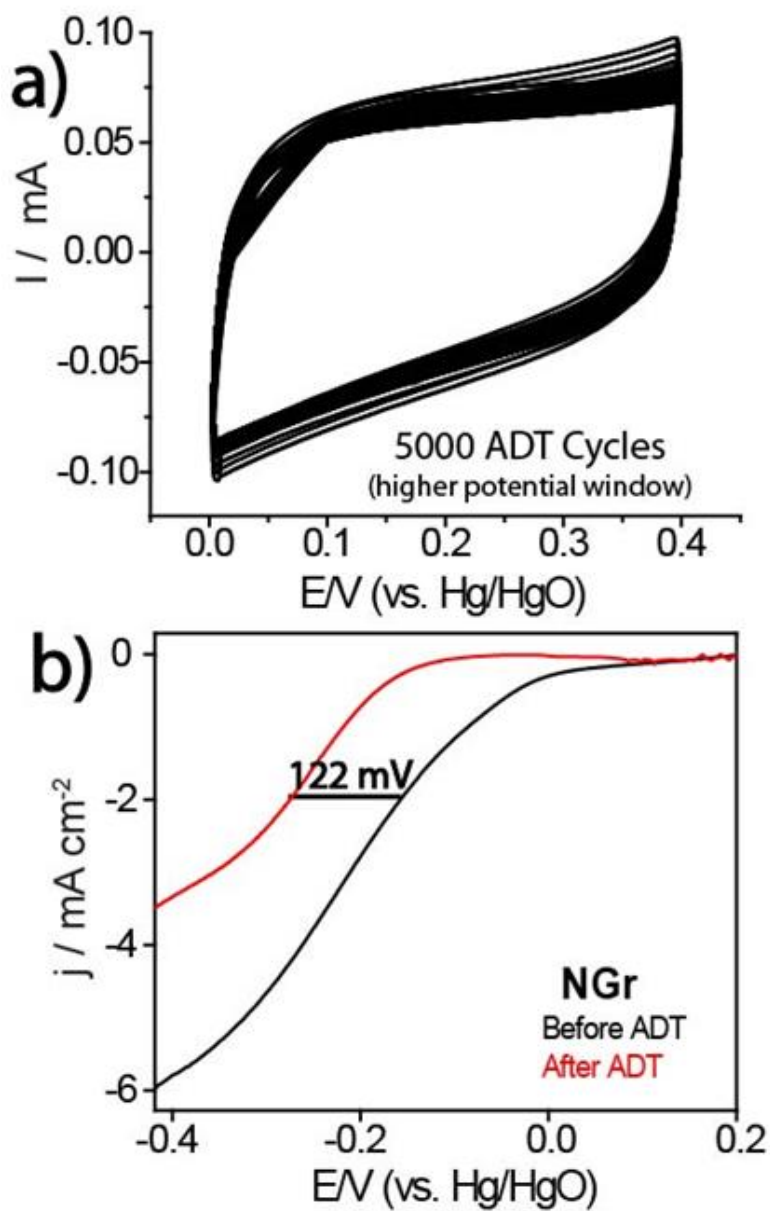

**Figure S13:** Accelerated durability test (ADT) of NGr in a 0.1 M KOH. (a) 5000 potential cycles recorded at a scan rate of 50 mV/s in the potential window of 0.0 to 0.40 V (vs. Hg/HgO), and (b) comparative LSV curves before and after ADT, recorded at 10 mV/s.

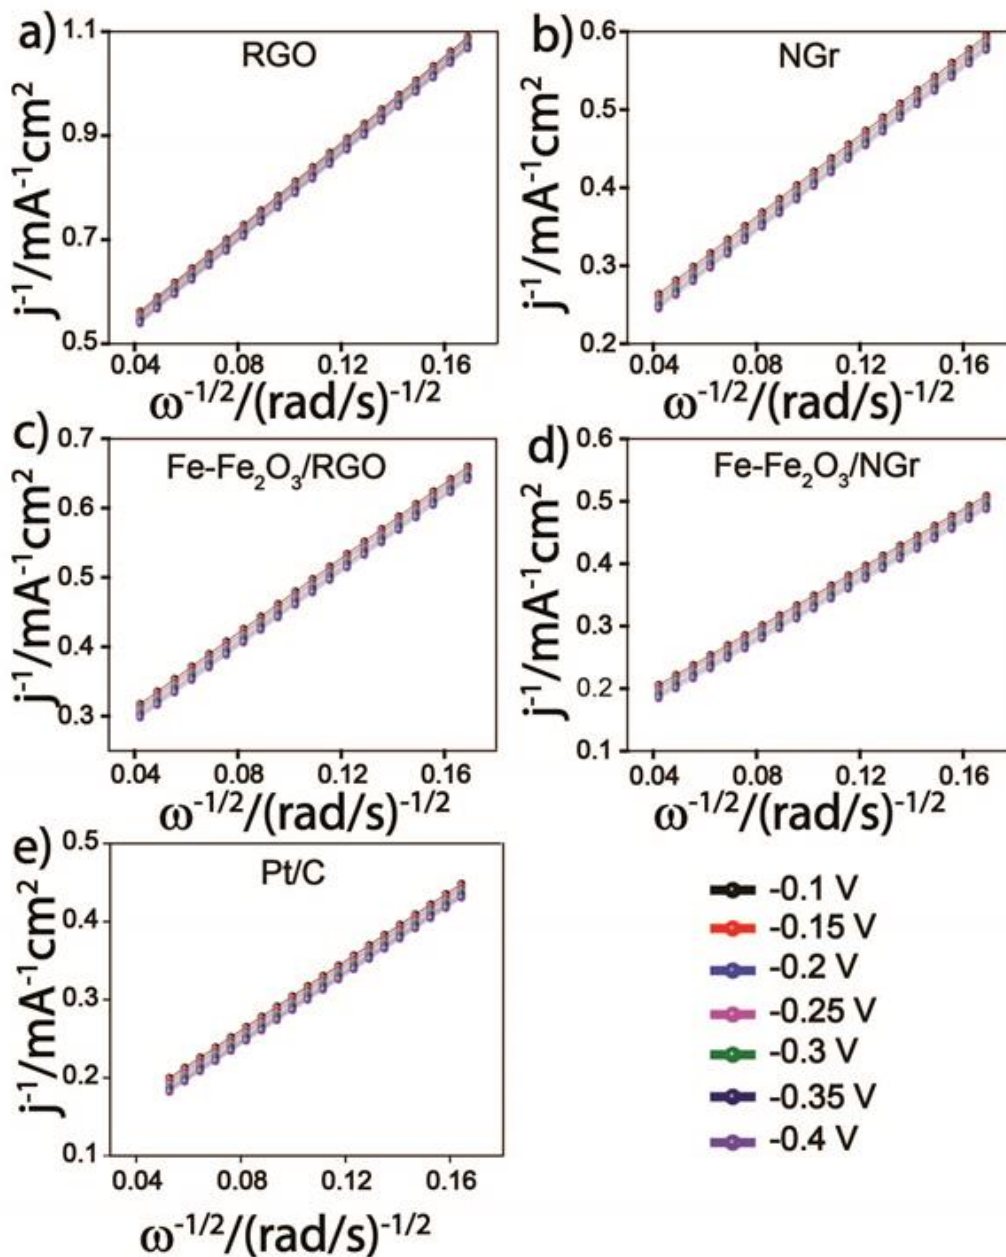

**Figure S14:** Koutecky-Levich (K-L) plots recorded at different potentials of (a) RGO, (b) NGr, (c) Fe-Fe<sub>2</sub>O<sub>3</sub>/RGO, (d) Fe-Fe<sub>2</sub>O<sub>3</sub>/NGr and (e) Pt/C.

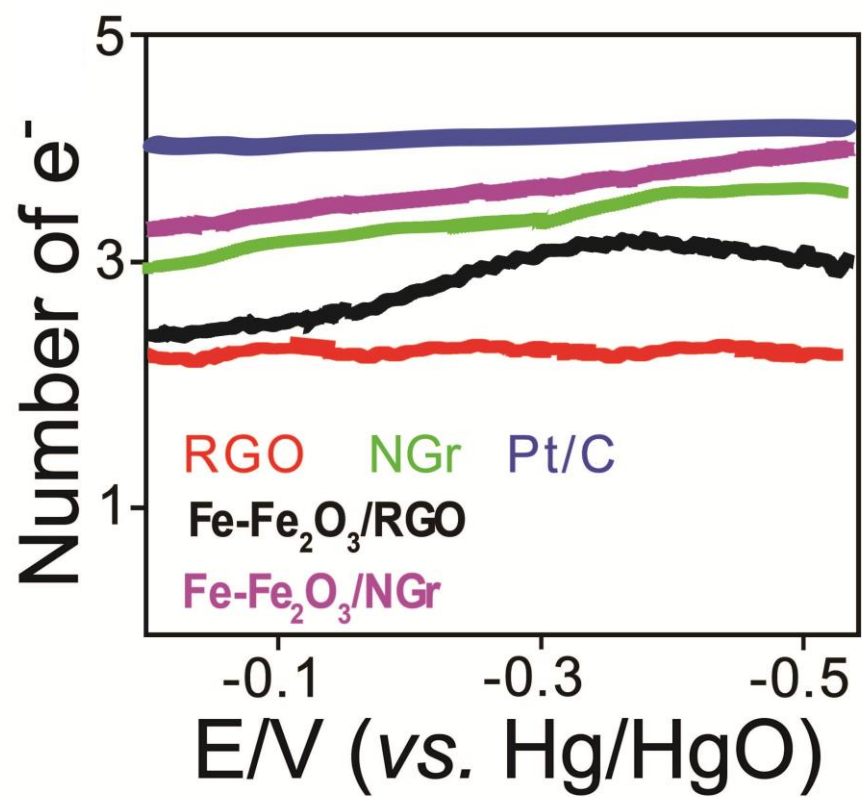

**Figure S15:** Plots representing the calculated values of the number of electrons transferred with respect to the potential of the disc electrode.



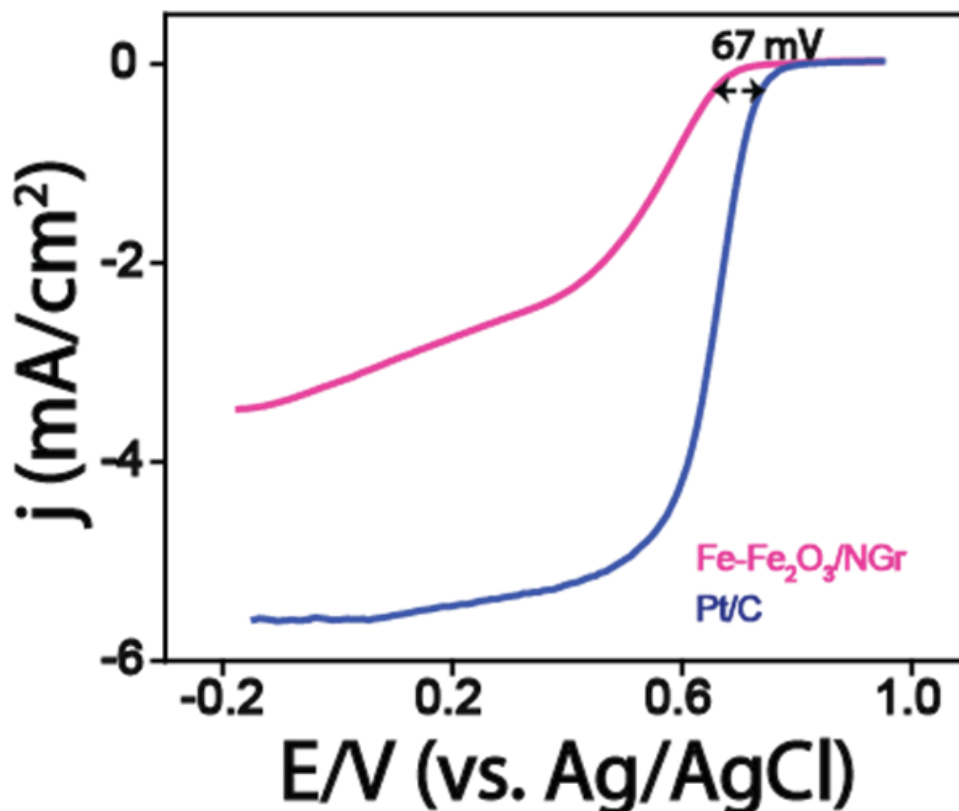

**Figure S16:** Comparative LSVs of Fe-Fe<sub>2</sub>O<sub>3</sub>/NGr and Pt/C recorded at 1600 rpm. Conditions: electrolyte: O<sub>2</sub>-saturated 0.1 M HClO<sub>4</sub> and scan rate: 10 mV/s.

The obtained activity of Fe-Fe<sub>2</sub>O<sub>3</sub>/NGr in acidic condition is found to be less in comparison to the commercially available Pt/C. The onset potential of Fe-Fe<sub>2</sub>O<sub>3</sub>/NGr is found to ~ 67 mV shifted to the negative direction compared to Pt/C. Along with this, the limiting current is found to be ~5.8 and ~3.7 mA/cm<sup>2</sup> for Pt/C and Fe-Fe<sub>2</sub>O<sub>3</sub>/NGr, respectively. Overall, the lower activity of Fe-Fe<sub>2</sub>O<sub>3</sub>/NGr is mainly expected to be due to the direct exposure of the Fe-particles to the electrolyte and their subsequent leaching out issues under acid condition during the measurement. A comparison of the present data with the literature reported systems are presented in **Table S1**.

**Table S1:** Comparison of the electrochemical data of systems reported in the literature with our system.

| Electrolyte | Electrocatalyst | Total Nitrogen Content | % of Pyridinic-N | % of Pyrrolic-N | % of Graphitic-N | ORR onset potential (V) | Limiting current density (mA/cm <sup>2</sup> ) | Reference |
|-------------|-----------------|------------------------|------------------|-----------------|------------------|-------------------------|------------------------------------------------|-----------|
| Acid        | CNG-3           | --                     | 36.70 wt. %      | 18.60 wt. %     | 34.40 wt. %      | ~0.8 V (vs. RHE)        | ~4.0                                           | 1         |
| Base        | NGE-1000        | 7 wt. %                | 21 wt. %         | 53 wt. %        | 26 wt. %         | ~-0.05 V (vs. Hg/HgO)   | ~4.5                                           | 2         |
| Acid        | Fe-PANI/C-Mela  | --                     | 24.2 wt. %       | --              | 41.9 wt. %       | 0.98 V (vs. RHE)        | ~6.0                                           | 3         |
| Acid        | Fe-N-C-900      | 6.6 at %               | 61.4 %           | 27.9 %          | 10.7 %           | 0.8 V (vs. RHE)         | ~2.2                                           | 4         |
| Base        | Co-N-CNF        | --                     | 28.85            | 26.99           | 40.54            | ~-0.05 V (vs. Hg/HgO)   | ~3.5                                           | 5         |
| Base        | N-CNF           | --                     | 27.46            | 27.30           | 39.27            | ~-0.05 V (vs. Hg/HgO)   | ~3.5                                           | 5         |
| Base        | Fe-N-C          | 3.08 at. %             | 1.1 %            | 1.82 %          | 0.16 %           | 1.05 V (vs. RHE)        | ~6.4                                           | 6         |
| Base        | Co-N-C          | 1.31 at.%              | 0.32 %           | 0.81 %          | 0.18 %           | ~-0.95 V (vs. RHE)      | ~6.0                                           | 6         |
| Base        | NCNTa           | 2.35 at.%              | 14.83 at.%       | 68.20 at.%      | 16.96 at.%       | -0.15 V (vs. Ag/AgCl)   | 3.19                                           | 7         |

*Comparison of Electrochemical activity of different carbon morphologies reported in literature.*

| Electrolyte | Electrocatalyst | ORR onset potential (V) | Limiting current density (mA/cm <sup>2</sup> ) | Reference |
|-------------|-----------------|-------------------------|------------------------------------------------|-----------|
| Base        | N-G-CNT         | 1.08 V (Vs. RHE)        | ~6.0                                           | 8         |
|             | N-CNT           | ~-0.9 V (Vs. RHE)       | ~5.5                                           |           |
| Acid        | N-G-CNT         | ~-0.8 V (Vs. RHE)       | ~6.0                                           |           |
|             | N-CNT           | ~-0.7 V (vs. RHE)       | ~4.5                                           |           |

|      |                                                            |                       |       |    |
|------|------------------------------------------------------------|-----------------------|-------|----|
| Acid | PANI-Fe/Silica Colloid                                     | ~-0.84 V (Vs. RHE)    | 4.4   | 9  |
|      | PANi-Fe/C<br>(C: Vulcan XC-72)                             | ~-0.78 V (Vs. RHE)    | 3.3   |    |
| Acid | FeCo/KB                                                    | ~-0.7 V (Vs. RHE)     | ~-5.0 | 10 |
| Acid | PANI/Fe/Vulcan XC                                          | ~-0.89 V (Vs. RHE)    | ~-3.8 | 11 |
|      | PANI/Fe/KJ-300J                                            | 0.91 V (Vs. RHE)      | ~-4.2 |    |
|      | PANI/Fe/BP-2000                                            | 0.91 V (Vs. RHE)      | ~-4.5 |    |
|      | PANI/Fe/MWCNTs                                             | 0.91 V (Vs. RHE)      | ~-4.0 |    |
| Base | Fe <sub>3</sub> O <sub>4</sub> /N-GAs                      | -0.19 V (vs. Ag/AgCl) | --    | 12 |
| Acid | Fe <sub>2</sub> O <sub>3</sub> /Vulcan XC<br>(No Nitrogen) | Very Poor Activity    | ~-0.1 | 4  |
| Base | NCNTa                                                      | -0.15 V (vs. Ag/AgCl) | 3.19  | 7  |

Electrochemical activity of our electrocatalyst i.e. Fe-Fe<sub>2</sub>O<sub>3</sub>/NGr.

| Electrolyte | Electrocatalyst                        | Total Nitrogen Content | % of Pyridinic-N | % of Pyrrolic-N | % of Graphitic-N/Quaternary-N | ORR onset potential (V) | Limiting current density (mA/cm <sup>2</sup> ) | Reference    |
|-------------|----------------------------------------|------------------------|------------------|-----------------|-------------------------------|-------------------------|------------------------------------------------|--------------|
| Base        | Fe-Fe <sub>2</sub> O <sub>3</sub> /NGr | 3.62 wt. %             | 42.50 wt. %      | 33.35 wt. %     | 18.75 wt. %                   | 0.075 V (vs. Hg/HgO)    | ~7.0                                           | Present Work |
| Acid        | Fe-Fe <sub>2</sub> O <sub>3</sub> /NGr | 3.62 wt. %             | 42.50 wt. %      | 33.35 wt. %     | 18.75 wt. %                   | 0.633 V (vs. Ag/AgCl)   | ~3.7                                           | Present Work |

**Table S2:** Single cell performance data and comparison with literature reports.

| Cathode Electrocatalyst                | Cell temperature (°C) | Max. Power Density (mW/cm <sup>2</sup> ) | Reference           |
|----------------------------------------|-----------------------|------------------------------------------|---------------------|
| Fe/N/C                                 | 60                    | 75                                       | 6                   |
| Co/N/C                                 | 60                    | 68                                       | 6                   |
| NpGr-72                                | 27                    | 50                                       | 13                  |
| N-CNT                                  | 50                    | 37                                       | 14                  |
| MnO/GC                                 | 70                    | 98                                       | 15                  |
| Ag/C                                   | 25                    | 10                                       | 16                  |
| CoPc/MWCNTs                            | 50                    | 120                                      | 17                  |
| FePc/MWCNTs                            | 50                    | 60                                       | 17                  |
| Au/C                                   | 50                    | 36                                       | 18                  |
| Ag/C                                   | 50                    | 19                                       | 18                  |
| FeN/ CNH-900                           | 50                    | 35                                       | 19                  |
| Fe-Fe <sub>2</sub> O <sub>3</sub> /NGr | 60                    | 54.40                                    | <b>Present work</b> |

**References:**

1. S. M. Unni, R. Illathvalappil, P. K. Gangadharan, S. N. Bhang, S. Kurugot, *Chem Commun.*, 2014, **50**, 13769.
2. S. M. Unni, S. Devulapally, N. Karjule, S. Kurugot, *J. Mater. Chem. A*, 2012, **22**, 23506
3. H. Peng, Z. Mo, S. Liao, H. Liang, L. Yang, F. Luo, H. Song, Y. Zhong, B. Zhang, *Sci. Rep.*, 2013, DOI: 10.1038/Srep01765.
4. C. H. Choi, S. Y. Lee, S. Park, S. I. Woo, *Appl. Cat. B: Environmental* 2011, **103**, 362.
5. D. Shin, B. Jeong, B. S. Mun, H. Jeon, H. J. Shin, J. Baik, J. Lee, *J. Phys. Chem. C* 2013, **117**, 11619.
6. J. Sanetuntikul, S. Shanmugam, *Nanoscale*, 2015, **7**, 7644.

7. Z. Chen, D. Higgins, Z. Chen, *Carbon*, 2010, **48**, 3057.
8. J. Shui, M. Wang, F. Du, L. Dai, *Sci. Adv.*, 2015. DOI: 10.1126/sciadv.1400129.
9. H. W. Liang, W. Wei, Z. S. Wu, X. Feng, K. Mullen, *J. Am. Chem. Soc.*, 2013, **135**, 16002.
10. J. Y. Cheon, T. Kim, Y. H. Choi, H. Y. Jeong, M. G. Kim, Y. J. Sa, J. Kim, Z. Lee, T. H. Yang, K. Kwon, O. Terasaki, G. G. Park, R. R. Adzic, S. H. Joo, *Sci. Rep.*, 2013, **3**, 2715.
11. G. Wu, K. L. More, P. Xu, H. L. Wang, M. Ferrandon, A. J. Kropf, D. J. Myers, S. Ma, C. M. Johnston, P. Zelenay, *Chem Commun.*, 2013, **49**, 3291.
12. Z. S. Wu, S. Yang, Y. Sun, K. Parvez, X. Feng, K. Mullen, *J. Am. Chem. Soc.*, 2012, **134**, 9082.
13. T. Palanisevam, M. O. Valappil, R. Illathvalappil, S. Kurungot, *Energy Environ. Sci.*, 2014, **7**, 1059.
14. C. V. Rao, Y. Ishikawa, *J. Phys. Chem. C*, 2012, **116**, 4340.
15. J. W. D. Ng, Y. Gorlin, D. Nordlund, T. F. Jaramillo, *J. Electrochem. Soc.*, 2014, **161**, D3105.
16. S. M. Maheshwari, P. Sridhar, S. Pitchumani, *Electrocatalysis*, 2011, **3**, 13-21.
17. I. Kruusenberg, L. Matisen, Q. Shah, A. M. Kannan, K. Tammeveski, *Int. J. Hydrogen Energy*, 2012, **37**, 4406.
18. S. D. Poynton, J. P. Kizewski, R. C. T. Slade, J. R. Varcoe, *Solid State Ionics*, 2010, **181**, 219.
19. S. M. Unni, S. Ramadas, R. Illathvalappil, S. N. Bhange, S. Kurungot, *J. Mater. Chem. A*, 2015, **3**, 4361.
